# Supplementary material for: Extracellular Vesicles Released from Neprilysin Gene-Modified Human Umbilical Cord-Derived Mesenchymal Stem Cell Enhance Therapeutic Effects in an Alzheimer’s Disease Animal Model
Source: Hindawi journal article supplement (doi:10.1155/2021/5548630), 2021-12-03
Supplement: f1 [file 5548630.f1.pdf]

Supplementary figure 1.

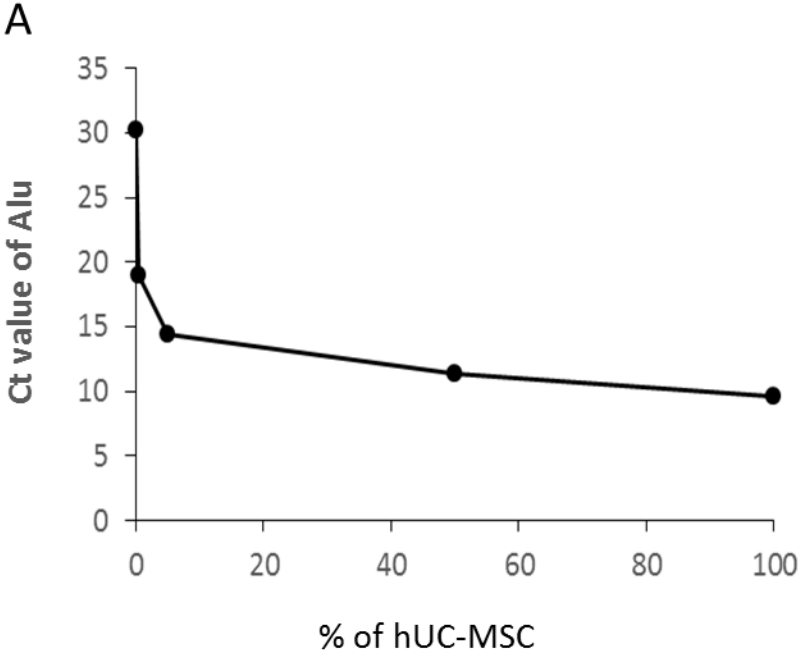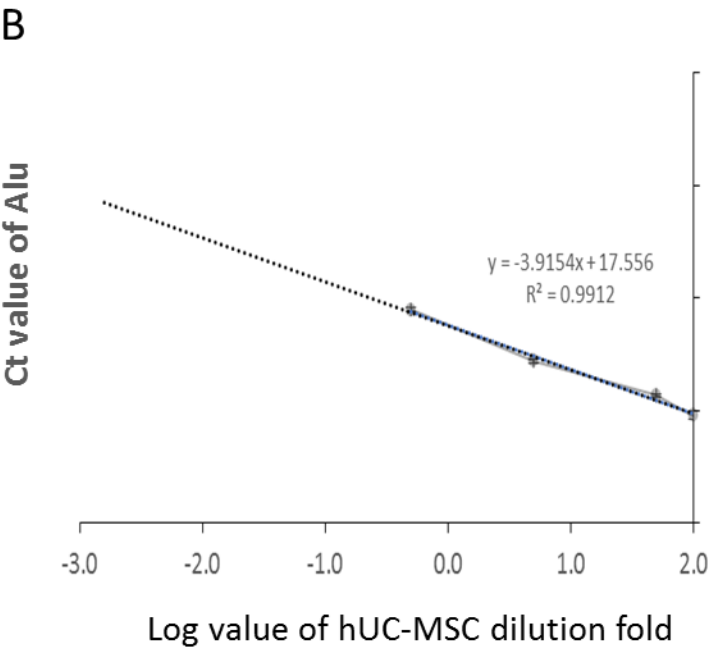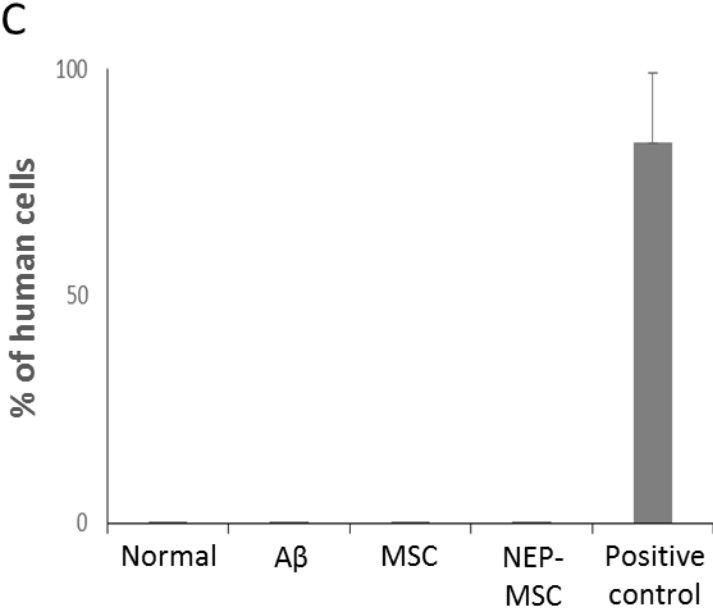

Supplementary figure 1. Quantification of human cells within the mouse brain by the standard curve and equation. (a) The Ct value obtained by qRT-PCR in mixed populations through diluting hUC-MSC to normal mouse cells. (b) The standard curve and equation by the Ct value against log value of hUC-MSC dilution fold. (c) The quantification of human cells within brain tissue of each group based on the Ct value by equation. The data represent mean  $\pm$  SEM. SEM, standard error of mean; hUC-MSC, human umbilical cord-derived mesenchymal stem cell; A $\beta$ , A $\beta$ 1-42 injection group; MSC, naïve hUC-MSCs injection group; NEP-MSC, nepri-lysin enhanced hUC-MSCs injection group; qRT-PCR, quantitative real-time polymerase chain reaction
